# Supplementary material
Source: PubMed Central journal article supplement (PMC5123881)
Supplement: 10-1055-s-0042-118598-sup_gf1106.pdf [file 10-1055-s-0042-118598-sup_gf1106.pdf]

# Vergleich der Fehler von 35 Gewichtsschätzungsformeln in einem Normkollektiv

## Comparison of Errors of 35 Weight Estimation Formulae in a Standard Collective

### Autoren

M. Hoopmann, K. O. Kagan, A. Sauter, H. Abele, P. Wagner

### Institut

Department of Obstetrics and Gynecology, University of Tübingen, Tübingen

### Schlüsselwörter

- Biometrie
- fetale Gewichtsschätzung
- Regressionsformel

### Key words

- biometry
- foetal weight estimation
- regression formula

### Zusammenfassung

**Fragestellung:** Die fetale Gewichtsschätzung ist integraler Bestandteil der Schwangerenvorsorge und des geburtshilflichen Alltags. Trotz ihrer bei unter- und übergewichtigen Kindern bekannten Fehleranfälligkeit hängen wichtige geburtshilfliche Entscheidungen von ihr ab. In der vorliegenden Arbeit wird die Genauigkeit und die Fehlerverteilung von 35 Gewichtsschätzformeln innerhalb des normalen Gewichtsbereichs von 2500–4000 g untersucht. Ziel der Untersuchung war es, Gewichtsschätzformeln zu finden, die den Anforderungen des klinischen Alltags bestmöglich entsprechen.

**Material und Methodik:** 35 klinisch etablierte Gewichtsschätzformeln wurden an 3416 Feten mit einem Gewicht zwischen 2500 und 4000 g analysiert. Hierbei wurden der mittlere prozentuale Fehler (MPF), der mittlere absolute prozentuale Fehler (MAPF), der Anteil der Schätzungen innerhalb eines Fehlerbereichs von 5, 10, 20 und 30% ermittelt und verglichen. Darüber hinaus wurden für den Zusammenhang von Schätz- zu tatsächlichem Geburtsgewicht getrennte Regressionsgeraden für den Gewichtsbereich 2500–4000 g berechnet. Die Formeln wurden somit auf eine mögliche Inhomogenität überprüft.

**Ergebnisse:** Der kleinste MPF wurde mittels den Hadlock-III- und -V-Formeln erzielt (0,8%, STW 9,2% bzw. -0,8%, STW 10,0%). Den geringsten absoluten Fehler (6,6%) sowie die günstigste Häufigkeitsverteilung bei Fällen unter 5% und 10% Fehler (43,9 und 77,5) wies die Halaska-Formel auf. In der grafischen Darstellung der Regressionsgeraden zeigen 16 Formeln eine Gewichtsüberschätzung im unteren Gewichtsbereich und eine -unterschätzung im oberen Bereich. 14 Formeln unterschätzen und lediglich 5 Formeln überschätzen über den getesteten Gewichtsbereich.

**Schlussfolgerung:** Die Mehrheit der Formeln unterschätzt im vollständigen oder zumindest oberen Gewichtsbereich das tatsächliche Geburts-

### Abstract

**Issue:** The estimation of foetal weight is an integral part of prenatal care and obstetric routine. In spite of its known susceptibility to errors in cases of underweight or overweight babies, important obstetric decisions depend on it. In the present contribution we have examined the accuracy and error distribution of 35 weight estimation formulae within the normal weight range of 2500–4000 g. The aim of the study was to identify the weight estimation formulae with the best possible correspondence to the requirements of clinical routine.

**Materials and Methods:** 35 clinically established weight estimation formulae were analysed in 3416 fetuses with weights between 2500 and 4000 g. For this we determined and compared the mean percentage error (MPE), the mean absolute percentage error (MAPE), and the proportions of estimates within the error ranges of 5, 10, 20 and 30%. In addition, separate regression lines were calculated for the relationship between estimated and actual birth weights for the weight range 2500–4000 g. The formulae were thus examined for possible inhomogeneities.

**Results:** The lowest MPE were achieved with the Hadlock III and V formulae (0.8%, STW 9.2% or, respectively, -0.8%, STW 10.0%). The lowest absolute error (6.6%) as well as the most favourable frequency distribution in cases below 5% and 10% error (43.9 and 77.5) were seen for the Halaska formula. In graphic representations of the regression lines, 16 formulae revealed a weight overestimation in the lower weight range and an underestimation in the upper range. 14 formulae gave underestimations and merely 5 gave overestimations over the entire tested weight range.

**Conclusion:** The majority of the tested formulae gave underestimations of the actual birth weight over the entire weight range or at least in the upper weight range. This result supports the cur-

eingereicht 16. 7. 2016

revidiert 5. 10. 2016

akzeptiert 5. 10. 2016

### Bibliografie

**DOI** <http://dx.doi.org/10.1055/s-0042-118598>  
Geburtsh Frauenheilk 2016; 76:  
1–8 © Georg Thieme Verlag KG  
Stuttgart · New York ·  
ISSN 0016-5751

### Korrespondenzadresse

**Dr. Markus Hoopmann**  
University of Tübingen  
Department of Obstetrics  
and Gynecology  
Calwer Straße 7  
72076 Tübingen  
MHoopmann@gmx.de

gewicht. Die Ergebnisse unterstützen aktuelle Ansätze eines 2-stufigen Vorgehens der Gewichtsschätzung, bei der die Formel erst nach Voreinschätzung des Gewichtsbereichs gewählt wird.

rent strategy of a two-stage weight estimation in which a formula is first chosen after a pre-estimation of the weight range.

## Einleitung

Die fetale Biometrie ist seit fast 4 Jahrzehnten fester Bestandteil der gemäß den Mutterschaftsrichtlinien etablierten Schwangervorsorge. Neben der körperlichen Integrität dient die Biometrie der Einschätzung des fetalen Gewichts und somit der zeitgerechten Entwicklung. Während die ersten Formeln zur Gewichtsschätzung alleine auf der Messung des biparietalen Durchmessers (BPD) beruhten, erbrachte erst die Weiterentwicklung einer Vielzahl von Formeln auf der Basis von Kombinationen biometrischer Marker einen Vorteil zu den klinischen Schätzmethoden wie Inspektion und Palpation [1–5].

Für die überwiegende Mehrheit der Schätzwichtsformeln gilt, dass sie mittels Regressionsanalysen an vergleichsweise kleinen Kollektiven durchschnittlicher Reifgeborener entwickelt wurden. Der mittlere prozentuale Fehler (MPF) sowie der mittlere absolute prozentuale Fehler (MAPF) der Formeln sind abhängig von dem Gewicht selbst. Es verwundert daher nicht, dass Gewichtsschätzungen sowohl bei untergewichtigen Kindern bzw. Frühgeborenen als auch bei makrosomen Kindern eine klinisch bedeutsame Fehleranfälligkeit aufweisen [6–8]. Allerdings ist gerade die Abgrenzung des normgewichtigen Kollektivs von den abnorm unter- und übergewichtigen Feten für das pränatale und geburtshilfliche Management von entscheidender Bedeutung. Die intrauterine Wachstumsrestriktion wie auch die Makrosomie weisen ein signifikantes Risiko für die neonatale wie auch maternale Morbidität und Mortalität auf [9–11]. Eine Abgrenzung des Normkollektivs kann nur dann erfolgen, wenn zumindest die Gewichtsschätzung in diesem Bereich als zuverlässig eingestuft werden kann. Die Spannweite dieses Gewichtsbereichs ist allerdings mit 2500 bis 4000 g als sehr hoch einzuschätzen. Es ist daher von Interesse, welche Gewichtsschätzformel sowohl den geringsten als auch den stabilsten Fehler innerhalb dieses Bereichs bzw. die größte Unabhängigkeit vom Gewichtsbereich des Kindes aufweist.

In dieser Studie soll daher mittels linearer Regression untersucht werden, ob und wie die Abweichung zwischen dem Schätzwert und dem tatsächlichen Geburtsgewicht zwischen 2500 und 4000 g variiert und welche Schätzformel diesbezüglich den geringsten konstanten Schätzfehler aufweist.

## Material und Methoden

### Beschreibung des Studienkollektivs

Für diese retrospektive Studie wurde innerhalb der perinatalen Datenbank der Universitätsfrauenklinik Tübingen nach lebendgeborenen Einlingen mit einem Geburtsgewicht zwischen 2500 und 4000 g innerhalb des Zeitraums 2010 und 2014 gesucht. Kinder mit strukturellen Fehlbildungen oder chromosomalen Aberrationen wurden von der Analyse ausgeschlossen.

### Durchführung der Biometrie

Im Rahmen der Routineversorgung am hiesigen Perinatalzentrum erhält jede Schwangere eine Ultraschalluntersuchung zeitnah zur Geburt. Diese Untersuchung dient vordergründig der Bestätigung der kindlichen Lage, der Einschätzung der Frucht-

wassermenge und der Ermittlung eines fetalen Schätzwichts (FSG) anhand üblicher Biometrie-basierter Gewichtsschätzformeln. Der biparietale (BPD) und der okzipitofrontale Durchmesser (OFD) des Kopfes wurden auf Höhe der transventrikulären Schnittebene von der äußeren Knochengrenze zur gegenüberliegenden äußeren Knochengrenze gemessen. Der Kopfumfang (KU) wurde entweder direkt mittels Ellipse- oder Trace-Funktion ermittelt oder aus den Distanzen errechnet ( $KU = 2,325 \times [OFD2 + BPD2]^{1/2}$ ) [12]. Das fetale Abdomen wurde mittels seiner transversen und anterior-posterioren Durchmesser (ATD, APD) auf Höhe des Magens und des Umbilikalvenen-Ductus-venosus-Komplexes vermessen. Der Abdomenumfang wurde hieraus berechnet ( $AU = \pi \times [ATD + APD/2]$ ). Die Femurlänge (FL) wurde als Distanz zwischen den Diaphysen abgemessen. Die individuellen Messungen, das FSG wie auch geburtshilflich relevante maternale Charakteristika wurden in der perinatalen Datenbank gespeichert. Das Geburtsgewicht (GG) wurde unmittelbar nach Geburt durch die betreuende Hebamme, den Geburtshelfer oder den Neonatologen ermittelt und dokumentiert. In jeder der eingeschlossenen Schwangerschaften wurde die letzte Ultraschalluntersuchung vor Entbindung ermittelt, die mindestens jeweils eine Messung von BPD, OFD, ATD, APD und FL aufwies. Schwangerschaften mit unvollständigen Messungen oder bei denen die letzte Messung mehr als 7 Tage vor der Entbindung zurücklag, wurden aus der Untersuchung ausgeschlossen. Jede Schwangerschaft wurde nur einmalig in die Studie eingeschlossen.

### Statistische Analyse

In jedem eingeschlossenen Fall wurde das FSG mittels der publizierten Formeln nach Birnholz, Combs, Campbell, Ferrero, Hadlock, Halaska, Hansmann, Hart, Higginbottom, Jordaan, Persson, Merz, Mielke, Ott, Rose and McCallum, Sabbagha, Schild, Schillinger, Scott, Shepard, Shinozuka, Siemer, Thurnau, Vintzileos, Warsof, Weiner und Woo ermittelt [3–5, 13–38]. Eine Auflistung der entsprechenden Formeln findet sich in **Tab. 1**. Die Genauigkeit der verschiedenen Formeln wurde ermittelt und verglichen mittels des mittleren prozentualen Fehlers ( $MPF = [FSG - GG]/GG \times 100$ ) und des mittleren absoluten prozentualen Fehlers ( $MAPF = |[FSG - GG]|/GG \times 100$ ). Der MPF repräsentiert hierbei den systematischen Fehler der Formeln. Seine Standardabweichung (STD) spiegelt die Zufallskomponente im Vorhersagefehler wider. Die 95%-Konfidenzintervalle (KI) für den MPF wurden berechnet und wurden zur Testung auf eine signifikante Abweichung zu 0 genutzt.

Für jede Schätzformel wurde der Anteil der Gewichtsschätzung mit einem prozentualen Fehler von  $\leq 5$ ,  $\leq 10$ ,  $\leq 20$  und  $\leq 30\%$  berechnet.

Mittels linearer Regressionsanalyse wurde der Zusammenhang zwischen dem Schätz- und dem tatsächlichen Geburtsgewicht untersucht. Mithilfe der Regression kann das Ausmaß des Schätzfehlers in Abhängigkeit vom tatsächlichen Geburtsgewicht eingeschätzt werden.

Tab. 1 Übersicht der untersuchten 35 Schätzwertformeln.

| Autor              | Daten                       | Formel                                                                                                                                                                                                                                                                                                                  |
|--------------------|-----------------------------|-------------------------------------------------------------------------------------------------------------------------------------------------------------------------------------------------------------------------------------------------------------------------------------------------------------------------|
| Birnholz [13]      | BPD, OFD, ATD               | $3,42928 \times (\text{BPD} \times \text{OFD}/1,264)^{0,5} \times \text{AD}^2/1000 + 41,218$ [g, mm]                                                                                                                                                                                                                    |
| Combs [14]         | HC, AC, FL                  | $0,23718 \times \text{AC}^2 \times \text{FL} + 0,03312 \times \text{HC}^3$ [g, cm]                                                                                                                                                                                                                                      |
| Campbell [15]      | AC                          | $e^{(-4,564 + 0,282 \times \text{AC} - 0,00331 \times \text{AC}^2)}$ [kg, cm]                                                                                                                                                                                                                                           |
| Ferrero [16]       | AC, FL                      | $10^{(0,77125 + 0,13244 \times \text{AC} - 0,12996 \times \text{FL} - 1,73588 \times \text{AC}^2/1000 + 2,18984 \times \text{FL}/\text{AC})}$ [g, cm]                                                                                                                                                                   |
| Hadlock I [4]      | BPD, HC, AC, FL             | $10^{(1,3596 + 0,0064 \times \text{HC} + 0,0424 \times \text{AC} + 0,174 \times \text{FL} + 0,00061 \times \text{BPD} \times \text{AC} - 0,00386 \times \text{AC} \times \text{FL})}$ [g, cm]                                                                                                                           |
| Hadlock II [4]     | AC, FL                      | $10^{(1,304 + 0,05281 \times \text{AC} + 0,1938 \times \text{FL} - 0,004 \times \text{AC} \times \text{FL})}$ [g, cm]                                                                                                                                                                                                   |
| Hadlock III [4]    | BPD, AC, FL                 | $10^{(1,335 - 0,0034 \times \text{AC} \times \text{FL} + 0,0316 \times \text{BPD} + 0,0457 \times \text{AC} + 0,1623 \times \text{FL})}$ [g, cm]                                                                                                                                                                        |
| Hadlock IV [4]     | HC, AC, FL                  | $10^{(1,326 - 0,00326 \times \text{AC} \times \text{FL} + 0,0107 \times \text{HC} + 0,0438 \times \text{AC} + 0,158 \times \text{FL})}$ [g, cm]                                                                                                                                                                         |
| Hadlock V [5]      | BPD, AC                     | $10^{(1,1134 + 0,05845 \times \text{AC} - 0,000604 \times \text{AC}^2 - 0,007365 \times \text{BPD}^2 + 0,000595 \times \text{BPD} \times \text{AC} + 0,1694 \times \text{BPD})}$ [g, cm]                                                                                                                                |
| Hadlock VI [5]     | HC, AC, FL                  | $10^{(1,5662 - 0,0108 \times \text{HC} + 0,0468 \times \text{AC} + 0,171 \times \text{FL} + 0,00034 \times \text{HC}^2 - 0,0003685 \times \text{AC} \times \text{FL})}$ [g, cm]                                                                                                                                         |
| Halaska [17]       | BPD, AC, FL                 | $10^{(0,64041 \times \text{BPD} - 0,03257 \times \text{BPD}^2 + 0,00154 \times \text{AC} \times \text{FL})}$ [g, cm]                                                                                                                                                                                                    |
| Hansmann [18]      | BPD, AD, GA,                | $-0,001665958 \times \text{AD}^3 + 0,4133629 \times \text{AD}^2 - 0,5580294 \times \text{AD} - 0,01231535 \times \text{BPD}^3 + 3,702 \times \text{BPD}^2 - 330,1811 \times \text{BPD} - 0,4937199 \times (\text{GA} + 1)^3 + 55,958061 \times (\text{GA} + 1)^2 - 2034,3901 \times (\text{GA} + 1) + 32768,19$ [g, mm] |
| Higginbottom [20]  | AC                          | $0,0816 \times \text{AC}^3$ [g, cm]                                                                                                                                                                                                                                                                                     |
| Jordaan [21]       | BPD, HC, AC                 | $10^{(2,3231 + 0,02904 \times \text{AC} + 0,0079 \times \text{HC} - 0,0058 \times \text{BPD})}$ [kg, cm]                                                                                                                                                                                                                |
| Merz I [22]        | BPD, AC                     | $-3200,40479 + 157,07186 \times \text{AC} + 15,90391 \times \text{BPD} \times \text{BPD}$ [g, cm]                                                                                                                                                                                                                       |
| Merz II [22]       | AC                          | $0,1 \times \text{AC}^3$ [g, cm]                                                                                                                                                                                                                                                                                        |
| Ott [26]           | HC, AC, FL                  | $10^{(-2,0661 + 0,04355 \times \text{HC} + 0,05394 \times \text{AC} - 0,0008582 \times \text{HC} \times \text{AC} + 1,2594 \times \text{FL}/\text{AC})}$ [kg, cm]                                                                                                                                                       |
| Rose-McCallum [27] | BPD, AD, FL                 | $e^{(0,143 \times [\text{BPD} + \text{AD} + \text{FL}] + 4,198)}$ [g, cm]                                                                                                                                                                                                                                               |
| Sabbagha [28]      | GA, HC, AC, FL              | $-55,3 - 16,35 \times (\text{GA} + \text{HC} + 2 \times \text{AC} + \text{FL}) + 0,25838 \times (\text{GA} + \text{HC} + 2 \times \text{AC} + \text{FL})^2$ [g, cm]                                                                                                                                                     |
| Schild I [29]      | weiblich<br>BPD, AC, FL     | $-4035,275 + 1,143 \times \text{BPD}^3 + 1159,878 \times \text{AC}^{0,5} + 10,079 \times \text{FL}^3 - 81,277 \times \text{FL}^2$ [g, cm]                                                                                                                                                                               |
| Schild II [29]     | männlich<br>BPD, HC, AC, FL | $1913,853 \times \log_{10}(\text{BPD}) + 0,01323 \times \text{HC}^3 + 55,532 \times \text{AC}^2 - 13602,664 \times \text{AC}^{0,5} - 0,721 \times \text{AC}^3 + 2,31 \times \text{FL}^3$ [g, cm]                                                                                                                        |
| Schillinger [30]   | BPD, ATD                    | $397,7 \times \text{BPD} + \text{ATD} - 4387$ [g, cm]                                                                                                                                                                                                                                                                   |
| Shepard [32]       | BPD, AC                     | $10^{(-1,7492 + 0,166 \times \text{BPD} + 0,046 \times \text{AC} - 0,002546 \times \text{AC} \times \text{BPD})}$ [kg, cm]                                                                                                                                                                                              |
| Shinozuka [33]     | BPD, AC, FL                 | $1,07 \times \text{BPD}^3 + 3,42 \times \text{ATD}^2 \times \text{FL}$ [g, cm]                                                                                                                                                                                                                                          |
| Warsof [3]         | BPD, AC                     | $10^{(-1,599 + 0,144 \times \text{BPD} + 0,032 \times \text{AC} - 0,000111 \times \text{BPD}^2 \times \text{AC})}$ [kg, cm]                                                                                                                                                                                             |
| Woo [38]           | BPD, AC, FL                 | $10^{(1,13705 + 0,15549 \times \text{BPD} + 0,0464 \times \text{AC} - 0,00279682 \times \text{BPD} \times \text{AC} + 0,037769 \times \text{FL} - 0,000494529 \times \text{AC} \times \text{FL})}$ [g, cm]                                                                                                              |
| Vinzeleos [36]     | BPD, AC                     | $10^{(1,879 + 0,084 \times \text{BPD} + 0,026 \times \text{AC})}$ [g, cm]                                                                                                                                                                                                                                               |
| Persson [23]       | BPD, AD, FL                 | $\text{BPD}^{0,972} \times ((\text{AD}1 + \text{AD}2)/2)^{1,743} \times \text{FL}^{0,367} \times 10^{(-2,646)}$ [g, cm]                                                                                                                                                                                                 |
| Schild III [39]    | HC, AC, FL                  | $5381,193 + 150,324 \times \text{HC} + 2,069 \times \text{FL}^3 + 0,0232 \times \text{AC}^3 - 6235,478 \times \text{LOG}(\text{HC})$ [g, cm]                                                                                                                                                                            |
| Scott [31]         | HC, AC, FL                  | $10^{(0,66 \times \text{LOG}(\text{HC}) + 1,04 \times \text{LOG}(\text{AC}) + 0,985 \times \text{LOG}(\text{FL}))}$ [g, cm]                                                                                                                                                                                             |
| Siemer [34]        | BPD, AC, FL                 | $-5948,336 + 2101,261 \times \text{LN}(\text{AC}) + 15,613 \times \text{FL}^2 + 0,0577 \times \text{BPD}^3$ [g, cm]                                                                                                                                                                                                     |
| Thurnau [35]       | BPD, AC                     | $(9 - 337 \times \text{BPD} \times \text{AC}) - 229$ [g, cm]                                                                                                                                                                                                                                                            |
| Weiner I [37]      | HC, AC, FL                  | $10^{(1,6961 + 0,02253 \times \text{HC} + 0,01645 \times \text{AC} + 0,06439 \times \text{FL})}$ [g, cm]                                                                                                                                                                                                                |
| Weiner II [37]     | HC, AC                      | $10^{(1,6575 + 0,04035 \times \text{HC} + 0,01285 \times \text{AC})}$ [g, cm]                                                                                                                                                                                                                                           |
| Mielke I [24]      | BPD, ATD, FL                | $e^{(3,067510 + 0,01677 \times \text{BPD} + 0,000412 \times \text{ATD}^2 + 0,040611 \times \text{FL} - 0,000000006027957 \times \text{BPD}^2 \times \text{ATD}^2 - 0,000005086 \times \text{ATD}^2 \times \text{FL})}$ [g, cm]                                                                                          |
| Mielke II [25]     | BPD, ATD, FL                | $e^{(3,704706 + 0,033276 \times \text{BPD} + 0,000093048 \times \text{ATD}^2 + 0,010570 \times \text{FL} - 0,00000002477864 \times \text{BPD}^2 \times \text{ATD}^2 + 0,000002009 \times \text{ATD}^2 \times \text{FL})}$ [g, cm]                                                                                       |

AC = Bauchumfang, HC = Kopfumfang, FL = Femurlänge, BPD = biparietaler Durchmesser, AD = abdominaler Durchmesser, GA = Gestationsalter, MW = maternales Gewicht

## Resultate

### Demografische Charakteristika

Insgesamt wurden 3416 Schwangerschaften nach Überprüfung der Einschlusskriterien in die Studie eingeschlossen. Das mittlere mütterliche Alter betrug 31,1 Jahre. Das mittlere maternale Gewicht lag bei 76,9 kg (STD  $\pm$  14,7 kg, Range 31,0–160,2 kg). Das Gestationsalter bei Geburt betrug median 39 + 1 SSW (Interquartilen Range [IQR] 38 + 0–40 + 1 SSW). Die Geschlechtsverteilung war ausgeglichen. Der Mittelwert des Gewichts bei Geburt betrug 3181 g. Die Ultraschalluntersuchungen fanden zum überwiegenden Teil maximal 1 Tag vor Geburt statt (56,6%). 34,3% der Untersuchungen erfolgten 2–5 Tage vor Geburt, 9,1% an den Tagen 6 und 7 vor Geburt.

### Mittlerer prozentualer Fehler und mittlerer absoluter prozentualer Fehler

Die MPF- und MAPF-Werte für die 35 angewendeten Formeln sind in **Tab. 2** aufgeführt. Die größte Überschätzung war bei der Birnholz-Formel mit einem MPF von –12,2%, die deutlichste Unterschätzung von der Mielke-I-Formel (MPF = 46,0%) zu beobachten. Hervorzuheben ist, dass sich bei der Hadlock-III-Formel (0,8%) und Hadlock-V-Formel (–0,8%) die geringsten prozentualen Fehler fanden. Die Standardabweichungen schwankten im Vergleich aller Formeln zwischen 6,4% (Schild II) und 16,4% (Hadlock IV).

20 Formeln (Halaska, Schild I, Shinozuka, Sabbagha, Hadlock III, Hadlock I, Ott, Hadlock V, Combs, Hadlock II, Merz I, Rose und McCallum, Shepard, Warsof, Ferrero, Hadlock VI, Campbell, Persson, Hansmann, Jordaan) wiesen einen MAPF-Wert von  $\leq$  10% auf. Herauszuheben ist die Halaska-Formel, die mit 6,6% den besten Wert aufwies. Sechs Formeln lagen mit ihren MAPF-Werten in dem intermediären Fehlerbereich von 10,1 bis  $\leq$  15% und weitere

**Tab. 2** MPF- und MAPF-Werte für den Bereich der Geburtsgewichte von 2500–4000 g aller 35 Formeln inklusive Standardabweichungen.

|               | MPE (%)     |      | Konfidenzintervall |       | MAPE (%)    |      |
|---------------|-------------|------|--------------------|-------|-------------|------|
|               | Mittelwerte | STD  | untere Grenze      |       | Mittelwerte | STD  |
|               |             |      | obere Grenze       |       |             |      |
| Halaska       | 0,9         | 8,1  | 0,6                | 1,2   | 6,6         | 4,8  |
| Schild I      | 1,9         | 8,2  | 1,6                | 2,2   | 6,8         | 5,0  |
| Shinozuka     | -1,5        | 8,9  | -1,8               | -1,2  | 7,2         | 5,4  |
| Sabbagha      | 2,8         | 8,6  | 2,5                | 3,1   | 7,3         | 5,4  |
| Hadlock III   | 0,8         | 9,2  | 0,5                | 1,1   | 7,4         | 5,5  |
| Hadlock I     | 2,5         | 8,9  | 2,2                | 2,8   | 7,5         | 5,5  |
| Ott           | 3,9         | 8,5  | 3,6                | 4,2   | 7,5         | 5,5  |
| Hadlock V     | -0,8        | 10,0 | -1,1               | -0,5  | 8,0         | 6,1  |
| Combs         | 5,6         | 8,1  | 5,3                | 5,9   | 8,1         | 5,7  |
| Hadlock II    | 3,6         | 9,6  | 3,3                | 3,9   | 8,3         | 6,1  |
| Merz I        | -5,0        | 9,3  | -5,3               | -4,7  | 8,4         | 6,5  |
| Rose-McCallum | -1,9        | 10,5 | -2,2               | -1,6  | 8,5         | 6,5  |
| Shepard       | -1,9        | 10,6 | -2,2               | -1,6  | 8,5         | 6,6  |
| Warsof        | 3,2         | 10,1 | 2,9                | 3,5   | 8,5         | 6,3  |
| Ferrero       | -3,5        | 10,3 | -3,8               | -3,2  | 8,6         | 6,6  |
| Hadlock VI    | 6,2         | 8,7  | 5,9                | 6,5   | 8,7         | 6,2  |
| Campbell      | 5,0         | 9,9  | 4,7                | 5,5   | 8,9         | 6,7  |
| Persson       | 6,4         | 9,0  | 6,1                | 6,7   | 9,0         | 6,4  |
| Hansmann      | -7,3        | 9,1  | -7,6               | -7,0  | 9,3         | 7,1  |
| Jordaan       | 5,0         | 10,6 | 4,7                | 5,3   | 9,5         | 6,9  |
| Schillinger   | -9,6        | 9,3  | -9,9               | -9,3  | 10,9        | 7,8  |
| Vinzeleos     | -7,0        | 12,9 | -7,4               | -6,6  | 11,5        | 9,1  |
| Higginbottom  | 9,2         | 13,1 | 8,8                | 9,6   | 13,1        | 9,2  |
| Hadlock IV    | 3,4         | 16,4 | 2,9                | 3,9   | 13,3        | 10,0 |
| Weiner I      | 12,9        | 8,9  | 12,6               | 13,2  | 13,6        | 7,7  |
| Birnholz      | -12,2       | 11,7 | -12,6              | -11,8 | 13,9        | 9,8  |
| Merz II       | -11,3       | 16,1 | -11,8              | -10,8 | 15,4        | 12,2 |
| Siemer        | 16,7        | 6,6  | 16,5               | 16,9  | 16,8        | 6,4  |
| Thurnau       | 17,0        | 7,0  | 6,8                | 7,2   | 17,1        | 6,8  |
| Scott         | 17,6        | 6,8  | 17,4               | 17,8  | 17,6        | 6,7  |
| Woo           | 17,9        | 7,3  | 17,7               | 18,1  | 18,0        | 7,1  |
| Weiner II     | 19,7        | 9,9  | 19,4               | 20,0  | 20,1        | 9,1  |
| Schild II     | 23,0        | 6,4  | 22,8               | 23,2  | 23,0        | 6,3  |
| Mielke II     | 25,8        | 10,7 | 25,5               | 26,1  | 25,9        | 10,5 |
| Mielke I      | 46,0        | 8,1  | 45,7               | 46,3  | 46,0        | 8,1  |

9 Formeln hatten MAPE-Werte in einem bedenklichen Bereich von  $\geq 15,1\%$ .

Die **Tab. 3** stellt die Häufigkeitsverteilung der Unterschiede zwischen Geburtsgewicht und Schätzwert für die einzelnen Formeln für den Gewichtsbereich von 2500–4000 g dar. Das günstige Abschneiden der Halaska-Formel bestätigt sich hier. Mittels der Gewichtsschätzung nach der Halaska-Formel liegen 43,85% der Fälle unterhalb der 5%- und 77,52% unterhalb der 10%-Fehlermarke. Insgesamt sind es 22 Formeln, bei denen mehr als die Hälfte der Schätzwerte eine Abweichung von  $\leq 10\%$  aufweisen. Vier Formeln (Weiner II, Schild II, Mielke II und Mielke I) hingegen schätzen mehr als die Hälfte der Fälle mit einer klinisch bedenklichen Abweichung von größer 20%.

### Regressionsanalyse zwischen Schätzfehler und tatsächlichem Geburtsgewicht

Die Ermittlung der Regressionsgeraden konnte mittels der grafischen Auftragung die Varianz der Abweichungen zwischen Schätz- und Geburtsgewicht über den gesamten Gewichtsbereich hinweg demonstrieren. **Abb. 1** zeigt die 16 Formeln, die einen Schnittpunkt mit der idealen Regressionsgeraden ( $x$  [Geburtsgewicht] =  $y$  [Schätzwert]) aufweisen. Allen Formeln ist gemeinsam, dass sie aus einem Bereich der Gewichtüberschätzung

im unteren Gewichtsbereich zu einem Bereich der Unterschätzung übergehen.

**Abb. 2** zeigt die Verteilung der 5 Formeln, die durchgehend eine Gewichtüberschätzung aufwiesen. Am nächsten und nahezu parallel zur idealen Gerade verlaufen die Schätzungen gemäß der Rose-McCallum-Formel. **Abb. 3** hingegen veranschaulicht die Verteilung bei den 14 Formeln, die durchgehend zu einer Gewichtsschätzung führen. Hier zeigen sich deutlich unterschiedliche Verläufe. Während im unteren Gewichtsbereich die Formel nach Jordaan der Idealen am nächsten kommt, so gilt dies im oberen Gewichtsbereich für die Schild-II-Formel.

### Diskussion

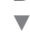

In der vorliegenden Arbeit konnten wir anhand der Messungen an 3416 Feten zeigen, dass der kleinste MPF mittels den Hadlock-III- und -V-Formeln erzielt werden konnte (0,8%, STD 9,2% bzw. -0,8%, STD 10,0%). Den geringsten absoluten Fehler (6,6%) sowie die günstigste Häufigkeitsverteilung bei Fällen unter 5% und 10% Fehler (43,9 und 77,5) wies die Halaska-Formel auf. Dies entspricht den Erwartungswerten aus vergleichbaren Vorarbeiten. Die Mehrheit der Gewichtsschätzformeln wurde an durch-

**Tab. 3** Häufigkeit der Abweichungen zwischen Schätz- und Geburtsgewicht in einem Gewichtsbereich von 2 500–4 000 g.

| Formel        | Unterschied zwischen Geburts- und Schätzwert kleiner als: |            |            |            |
|---------------|-----------------------------------------------------------|------------|------------|------------|
|               | 5 Prozent                                                 | 10 Prozent | 20 Prozent | 30 Prozent |
| Halaska       | 43,85%                                                    | 77,52%     | 98,77%     | 100,00%    |
| Schild I      | 43,62%                                                    | 76,38%     | 98,27%     | 99,97%     |
| Shinozuka     | 41,98%                                                    | 73,07%     | 97,51%     | 99,77%     |
| Sabbagha      | 41,31%                                                    | 71,72%     | 97,98%     | 99,88%     |
| Hadlock III   | 40,28%                                                    | 71,49%     | 97,19%     | 99,82%     |
| Hadlock I     | 40,60%                                                    | 71,46%     | 97,34%     | 99,94%     |
| Ott           | 39,99%                                                    | 70,32%     | 97,28%     | 99,91%     |
| Hadlock V     | 37,76%                                                    | 68,68%     | 95,52%     | 99,56%     |
| Combs         | 36,15%                                                    | 67,10%     | 96,34%     | 99,94%     |
| Hadlock II    | 36,48%                                                    | 65,49%     | 95,64%     | 99,74%     |
| Merz I        | 37,88%                                                    | 66,04%     | 94,06%     | 99,39%     |
| Rose-McCallum | 35,63%                                                    | 65,52%     | 93,97%     | 99,44%     |
| Shepard       | 35,98%                                                    | 65,66%     | 93,91%     | 99,06%     |
| Ferrero       | 35,51%                                                    | 64,17%     | 93,53%     | 99,36%     |
| Hadlock VI    | 32,96%                                                    | 62,76%     | 94,67%     | 99,80%     |
| Campbell      | 34,75%                                                    | 62,09%     | 93,03%     | 99,33%     |
| Persson       | 32,90%                                                    | 60,69%     | 93,62%     | 99,82%     |
| Hansmann      | 34,02%                                                    | 61,62%     | 91,36%     | 98,59%     |
| Jordaan       | 32,11%                                                    | 58,96%     | 90,95%     | 99,33%     |
| Schillinger   | 27,20%                                                    | 52,78%     | 86,74%     | 97,80%     |
| Vinzeleos     | 28,37%                                                    | 52,69%     | 83,55%     | 95,70%     |
| Higginbottom  | 22,72%                                                    | 43,41%     | 76,49%     | 95,49%     |
| Hadlock IV    | 21,98%                                                    | 44,15%     | 76,87%     | 93,88%     |
| Weiner I      | 15,13%                                                    | 35,51%     | 78,60%     | 98,19%     |
| Birnholz      | 21,02%                                                    | 40,63%     | 75,09%     | 92,83%     |
| Merz II       | 21,75%                                                    | 40,31%     | 69,85%     | 88,00%     |
| Siemer        | 4,42%                                                     | 16,10%     | 66,63%     | 99,24%     |
| Thurnau       | 4,33%                                                     | 15,37%     | 65,13%     | 97,95%     |
| Woo           | 3,60%                                                     | 13,55%     | 59,69%     | 95,84%     |
| Weiner II     | 5,56%                                                     | 14,72%     | 48,71%     | 86,24%     |
| Schild II     | 0,50%                                                     | 2,49%      | 30,85%     | 86,56%     |
| Mielke II     | 2,72%                                                     | 7,52%      | 28,69%     | 64,08%     |
| Mielke I      | 0,00%                                                     | 0,00%      | 0,09%      | 3,28%      |

schnittlich schweren Kindern zwischen 2500–4000 g entwickelt und weist dort einen vergleichsweise niedrigen absoluten prozentualen Fehler zwischen 6–10% wie in unserer Serie auf [40–42]. Lediglich 5 Formeln zeigten eine durchgängige Gewichtsüberschätzung. 14 Formeln unterschätzten das fetale Gewicht über den vollständigen Gewichtsbereich, 16 im oberen Gewichtsbereich.

Ansätze zur Verbesserung der Gewichtsschätzung sind vielfältig. Bezogen auf die sonografische Messgenauigkeit zeigen mehrere Arbeiten, dass praktische Ultraschallerfahrung bzw. gezieltes Training an Patienten oder Simulatoren den Fehler reduzieren kann [41,43]. Auch ein zeitlicher Abstand zwischen Messung und Geburt von  $\leq 7$  Tagen hilft bei der Reduktion des Fehlers [44]. Ein anderer Ansatz insbesondere bei schweren Kindern ist die Optimierung der Gewichtsschätzung durch Kombination der sonografischen Befunde mit maternalen und schwangerschaftsspezifischen Parametern wie Schwangerschaftsalter, Parität, fetales Geschlecht, maternaler Größe oder Gewicht. Der vermeintliche Benefit eines solchen aufwendigeren Vorgehens wird in der aktuellen Literatur jedoch kontrovers diskutiert [45–47]. Einigkeit besteht allerdings darin, dass eine maternale Adipositas den Schätzfehler erhöht [48,49].

Schlussendlich muss der Schätzfehler der sonografischen Formeln als methodenimmanent betrachtet werden. Kehl et al. konnten in einer Studie mittels nachgeburtlich durchgeführter

Messungen an 628 neugeborenen Einlingen den systematischen Fehler auf ein Minimum reduzieren. Trotzdem lag der MPF der verwendeten Formeln zwischen 7,42 und 8,77%. Der Anteil der Schätzungen mit einem Fehler unter 10% lag bei 74,6–81,3%. Unter Berücksichtigung der „95%-limits-of-agreement“ lagen die Schätzungen in einem Bereich von  $\pm 500$  g. Diese Eckdaten der optimalen Gewichtsschätzung decken sich mit unseren Ergebnissen bei Verwendung der besten Formeln, wie denen nach Halaska oder Hadlock.

Unsere Daten zeigen, dass viele Formeln innerhalb des normalen Gewichtsbereichs eine wechselnde Fehleranfälligkeit aufweisen. Diese Beobachtung stützt den Ansatz aktueller Arbeitsgruppen, bei der Gewichtsschätzung in 2 Schritten vorzugehen. In einem ersten Schritt wird hierbei z. B. durch Messung des AU der Gewichtsbereich eingegrenzt und davon abhängig die Formel gewählt. Es konnte gezeigt werden, dass Formeln, die speziell für Feten mit einem Bauchumfang unter 290 mm entwickelt wurden, einen signifikant besseren MAPF (7,13–7,61%) und deutlich mehr Messungen mit einem Fehler unter 10% aufweisen als die Warsof- und Hadlock-Formel [50]. Analoges konnte zu Kindern mit einem AU größer 360 mm nachgewiesen werden [51]. Einen vergleichbaren Ansatz verfolgt die sogenannte Zürich-Methode. Hierbei wird initial ein Produkt aus AU und FL gebildet. Bei Werten  $< 24 600$  wird die Hadlock-Formel verwendet, bei darüber liegenden Werten die Merz-Formel [52]. Unsere Daten bestätigen,

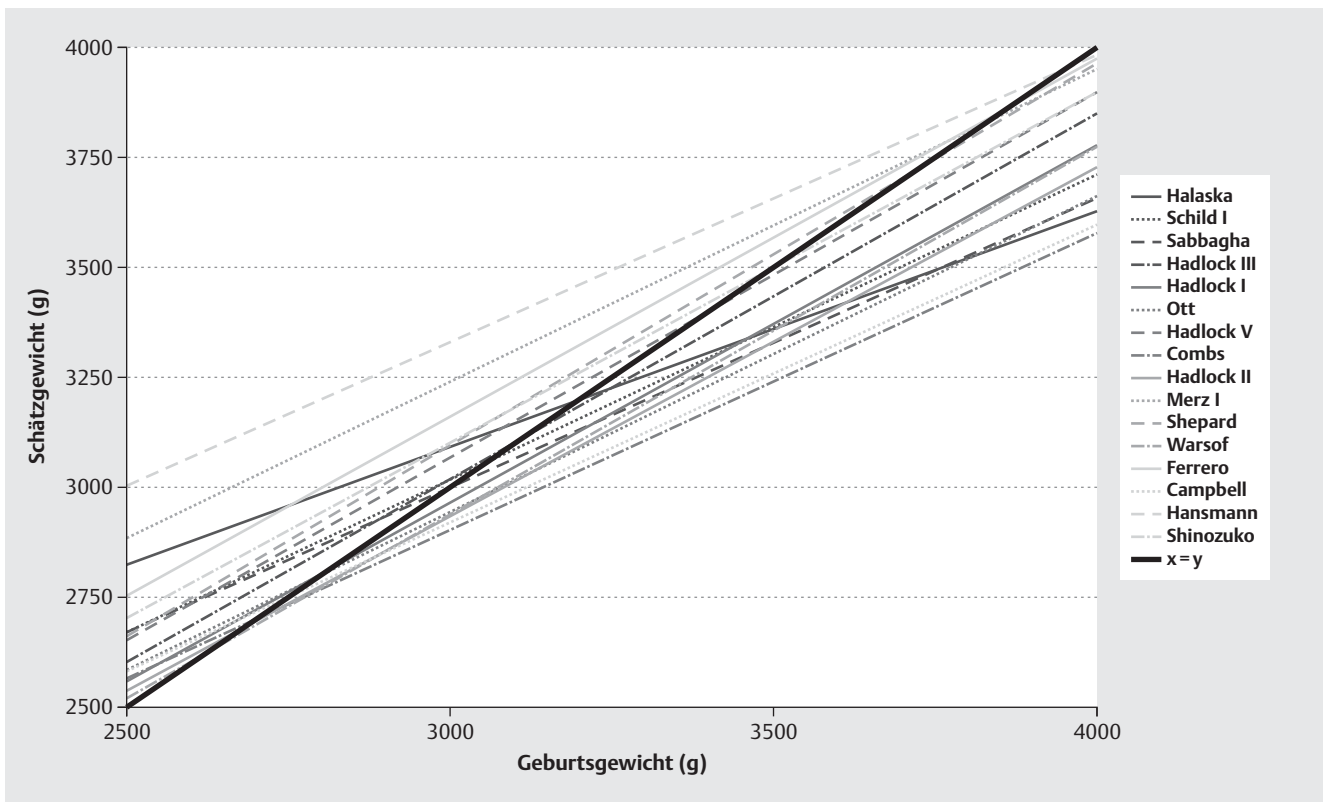

**Abb. 1** Geburts- und Schätzwert. Die aufgeführten Regressionsformeln haben bei einem Geburtsgewicht zwischen 2500 und 4000 g einen Schnittpunkt mit der idealen Regressionsformel  $y = x$ .

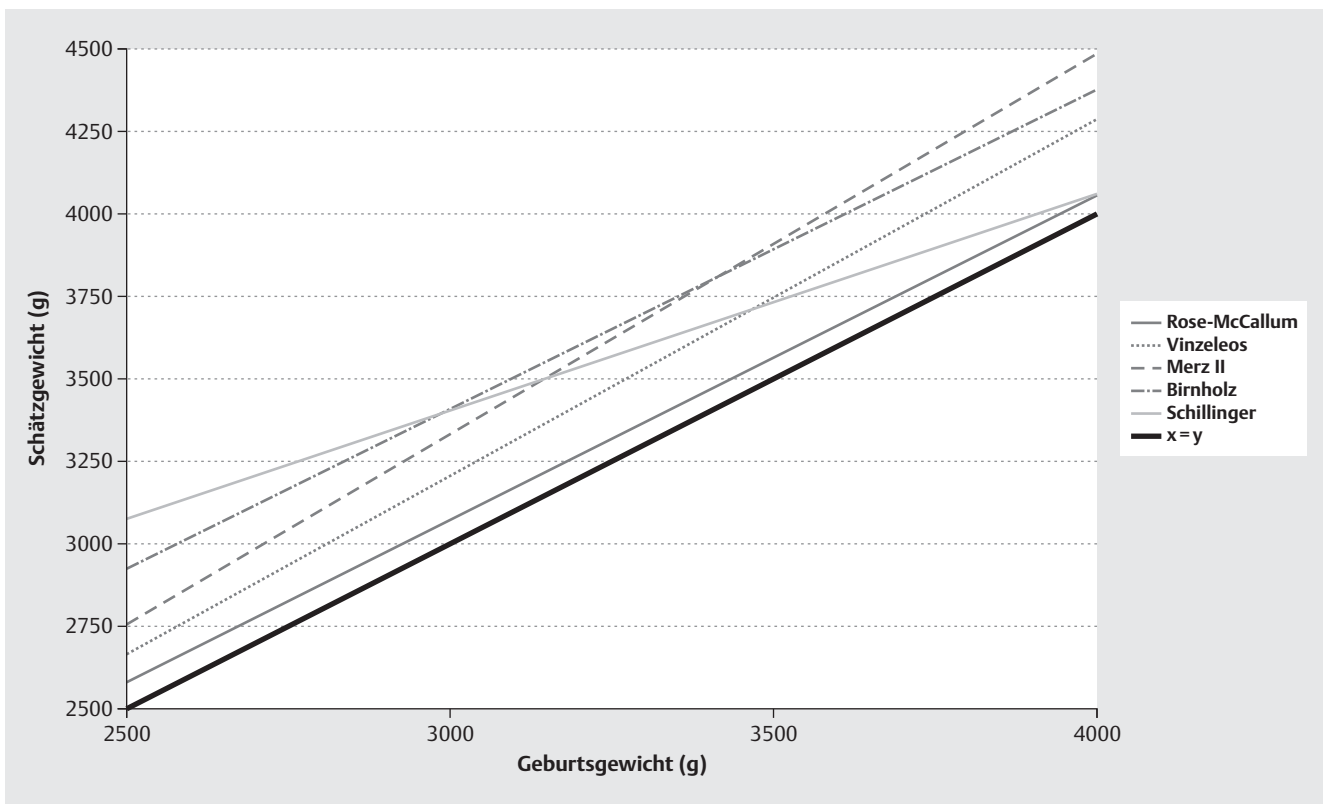

**Abb. 2** Geburts- und Schätzwert. Die aufgeführten Regressionsformeln haben bei einem Geburtsgewicht zwischen 2500 und 4000 g keinen Schnittpunkt mit der idealen Regressionsformel  $y = x$ . Das Schätzwert war im Mittel größer als das Geburtsgewicht.

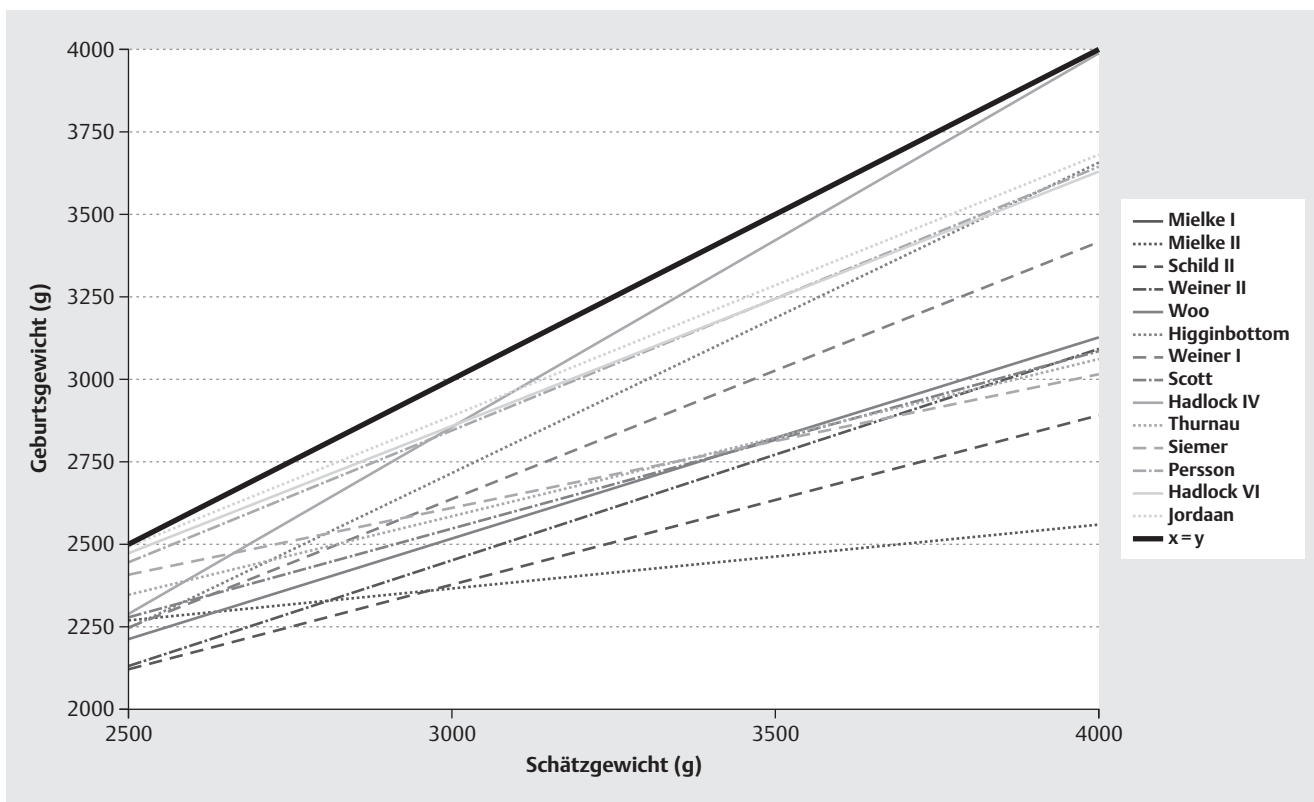

**Abb. 3** Geburts- und Schätzwert. Die aufgeführten Regressionsformeln haben bei einem Geburtsgewicht zwischen 2500 und 4000 g keinen Schnittpunkt mit der idealen Regressionsformel  $y=x$ . Das Schätzwert war im

Mittel kleiner als das Geburtsgewicht. Die Kurve gemäß der Mielke-I-Formel liegt unterhalb des abgebildeten Darstellungsbereichs.

dass die Merz-Formel im oberen Gewichtsbereich eine bessere Gewichtsschätzung erlaubt als die Hadlock-Formel.

Ein weiterer Ansatz der Verbesserung liegt in der Implementierung von 3-D-Messungen, in der Regel zur standardisierten Bestimmung eines Volumens aus dem fetalen Oberschenkelbereich. Zumindest bei Vorliegen eines manifesten Gestationsdiabetes scheint eine Verbesserung der Gewichtsschätzung durch 3-D-Messungen möglich, da in diesen Schwangerschaften gerade der Weichteilmantel das Fetalgewicht besonders beeinflusst [53]. Kritisch anzumerken ist zu den vorliegenden Daten, dass sie in ihrer Aussagekraft durch den retrospektiven Charakter limitiert sind. Weiterhin ist die monozentrische Datenerhebung eine Einschränkung. Diese wurde durch eine größere Anzahl beteiligter Untersucher verschiedenen Ausbildungsgrads relativiert.

### Schlussfolgerung

Gemessen am MPF und MAPF weisen die Formeln nach Hadlock und Halaska die geringsten Fehler auf. Die Mehrheit der Formeln neigt zur Gewichtsunterschätzung, die je nach Gewichtsbereich unterschiedlich stark ausgeprägt ist. Dies unterstützt aktuelle Ansätze eines 2-stufigen Vorgehens.

### Interessenkonflikt

Die Autoren erklären, dass es keinen Interessenkonflikt gibt.

### Literatur

- 1 Willocks J, Donald I, Duggan TC et al. Foetal cephalometry by ultrasound. *J Obstet Gynaecol Br Commonw* 1964; 71: 11–20
- 2 Loeffler FE. Clinical foetal weight prediction. *J Obstet Gynaecol Br Commonw* 1967; 74: 675–677
- 3 Warsof SL, Gohari P, Berkowitz RL et al. The estimation of fetal weight by computer-assisted analysis. *Am J Obstet Gynecol* 1977; 128: 881–892
- 4 Hadlock FP, Harrist RB, Sharman RS et al. Estimation of fetal weight with the use of head, body, and femur measurements—a prospective study. *Am J Obstet Gynecol* 1985; 151: 333–337
- 5 Hadlock FP, Harrist RB, Carpenter RJ et al. Sonographic estimation of fetal weight. The value of femur length in addition to head and abdomen measurements. *Radiology* 1984; 150: 535–540
- 6 Hoopmann M, Bernau B, Hart N et al. Do specific weight formulas for fetuses  $\leq 1500$  g really improve weight estimation? *Ultraschall in Med* 2010; 31: 48–52
- 7 Hoopmann M, Abele H, Wagner N et al. Performance of 36 different weight estimation formulae in fetuses with macrosomia. *Fetal Diagn Ther* 2010; 27: 204–213
- 8 Abele H, Hoopmann M, Wagner N et al. Accuracy of sonographic fetal weight estimation of fetuses with a birth weight of 1500 g or less. *Eur J Obstet Gynecol Reprod Biol* 2010; 153: 131–137
- 9 American College of Obstetricians and Gynecologists. ACOG Practice bulletin no. 134: fetal growth restriction. *Obstet Gynecol* 2013; 121: 1122–1133
- 10 Gyurkovits Z, Kálló K, Bakki J et al. Neonatal outcome of macrosomic infants: an analysis of a two-year period. *Eur J Obstet Gynecol Reprod Biol* 2011; 159: 289–292
- 11 Henriksen T. The macrosomic fetus: a challenge in current obstetrics. *Acta Obstet Gynecol Scand* 2008; 87: 134–145
- 12 Schmidt U, Temerinac D, Bildstein K et al. Finding the most accurate method to measure head circumference for fetal weight estimation. *Eur J Obstet Gynecol* 2014; 178: 153–156

- 13 *Birnholz JC*. An algorithmic approach to accurate ultrasonic fetal weight estimation. *Invest Radiol* 1986; 21: 571–576
- 14 *Combs CA, Jaekle RK, Rosenn B et al.* Sonographic estimation of fetal weight based on a model of fetal volume. *Obstet Gynecol* 1993; 82: 365–370
- 15 *Campbell S, Wilkin D.* Ultrasonic measurement of fetal abdomen circumference in the estimation of fetal weight. *Br J Obstet Gynaecol* 1975; 82: 689–697
- 16 *Ferrero A, Maggi E, Giancotti A et al.* Regression formula for estimation of fetal weight with use of abdominal circumference and femur length: a prospective study. *J Ultrasound Med* 1994; 13: 823–833
- 17 *Halaska MG, Vlk R, Feldmar P et al.* Predicting term birth weight using ultrasound and maternal characteristics. *Eur J Obstet Gynecol* 2006; 128: 231–235
- 18 *Hansmann M, Schuhmacher H, Voigt U.* Mehrparametrische nicht lineare Gewichtsschätzung mittels Ultraschall unter Berücksichtigung des Gestationsalters. In: Kratochwil A, Reinold E, Hrsg. *Ultraschalldiagnostik*. Stuttgart: Thieme; 1978
- 19 *Hart NC, Hilbert A, Meurer B et al.* Macrosomia: a new formula for optimized fetal weight estimation. *Ultrasound Obstet Gynecol* 2010; 35: 42–47
- 20 *Higginbottom J.* Estimation of fetal weight. *Ultrasound Med Biol* 1977; 3: 59
- 21 *Jordaan HV, Dunn LJ.* A new method of evaluating fetal growth. *Obstet Gynecol* 1978; 51: 659–665
- 22 *Merz E, Lieser H, Schickentanz KH et al.* [Intrauterine fetal weight assessment using ultrasound. A comparison of several weight assessment methods and development of a new formula for the determination of fetal weight]. *Ultraschall Med* 1988; 9: 15–24
- 23 *Marsál K.* Antenatal diagnosis of intrauterine growth retardation by ultrasound. *Int J Technol Assess Health Care* 1992; 8 (Suppl. 1): 160–169
- 24 *Mielke G, Pietschbreitfeld B, Salinas R et al.* A new formula for prenatal ultrasonographic weight estimation in extremely preterm fetuses. *Gynecol Obstet Invest* 1995; 40: 84–88
- 25 *Mielke G, Pietschbreitfeld B, Regele B et al.* An accurate method for sonographic estimation of the weight of very preterm fetuses. *Gynecol Obstet Invest* 1997; 43: 98–103
- 26 *Ott WJ, Doyle S, Flamm S et al.* Accurate ultrasonic estimation of fetal weight. Prospective analysis of new ultrasonic formulas. *Am J Perinatol* 1986; 3: 307–310
- 27 *Rose BI, McCallum WD.* A simplified method for estimating fetal weight using ultrasound measurements. *Obstet Gynecol* 1987; 69: 671–675
- 28 *Sabbagha R, Minogue J, Tamura R et al.* Estimation of birth-weight by use of ultrasonographic formulas targeted to large-for-gestational-age, appropriate-for-gestational-age, and small-for-gestational-age fetuses. *Am J Obstet Gynecol* 1989; 160: 854–862
- 29 *Schild RL, Sachs C, Fimmers R et al.* Sex-specific fetal weight prediction by ultrasound. *Ultrasound Obstet Gynecol* 2004; 23: 30–35
- 30 *Schillinger H, Müller R, Wode J et al.* [Intrauterine weight determination of the fetus using ultrasonics]. *Arch Gynakol* 1975; 219: 399–401
- 31 *Scott F, Beeby P, Abbott J et al.* New formula for estimating fetal weight below 1000 g: comparison with existing formulas. *J Ultrasound Med* 1996; 15: 669–672
- 32 *Shepard MJ, Richards VA, Berkowitz RL et al.* An evaluation of two equations for predicting fetal weight by ultrasound. *Am J Obstet Gynecol* 1982; 142: 47–54
- 33 *Shinozuka N, Okai T, Kohzuma S et al.* Formulas for fetal weight estimation by ultrasound measurements based on neonatal specific gravities and volumes. *Am J Obstet Gynecol* 1987; 157: 1140–1145
- 34 *Siemer J, Hilbert A, Hart N et al.* A new sonographic weight formula for fetuses. *Ultraschall in Med* 2009; 30: 47–51
- 35 *Thurnau GR, Tamura RK, Sabbagha R et al.* A simple estimated fetal weight equation based on real-time ultrasound measurements of fetuses less than thirty-four weeks' gestation. *Am J Obstet Gynecol* 1983; 145: 557–561
- 36 *Vintzileos AM, Campbell WA, Rodis JF et al.* Fetal weight estimation formulas with head, abdominal, femur, and thigh circumference measurements. *Am J Obstet Gynecol* 1987; 157: 410–414
- 37 *Weiner CP, Sabbagha RE, Vaisrub N et al.* Ultrasonic fetal weight prediction: role of head circumference and femur length. *Obstet Gynecol* 1985; 65: 812–817
- 38 *Woo J, Wan M.* An evaluation of fetal weight prediction using a simple equation containing the fetal femur length. *J Ultrasound Med* 1986; 5: 453–457
- 39 *Schild RL, Fell K, Fimmers R et al.* A new formula for calculating weight in the fetus of < or = 1600 g. *Ultrasound Obstet Gynecol* 2004; 24: 775–780
- 40 *Melamed N, Yogev Y, Meizner I et al.* Sonographic fetal weight estimation: which model should be used? *J Ultrasound Med* 2009; 28: 617–629
- 41 *Siemer J, Egger N, Hart N et al.* Fetal weight estimation by ultrasound: comparison of 11 different formulae and examiners with differing skill levels. *Ultraschall Med* 2008; 29: 159–164
- 42 *Nahum GG, Stanislaw H.* Ultrasonographic prediction of term birth weight: How accurate is it? *Am J Obstet Gynecol* 2003; 188: 566–574
- 43 *Haist M, Schauf B, Kagan KO et al.* Verbesserung der Ergebnisqualität durch standardisiertes Training am Ultraschallsimulator. *Geburtsh Frauenheilk* 2010; 70: 844–848
- 44 *Faschingbauer F, Raabe E, Heimrich J et al.* Accuracy of sonographic fetal weight estimation: influence of the scan-to-delivery interval in combination with the applied weight estimation formula. *Arch Gynecol Obstet* 2016; 294: 487–493
- 45 *Nahum GG, Stanislaw H.* Fetal macrosomia is predicted earlier by combination birth-weight estimation methods than by ultrasound alone. *Ultrasound Obstet Gynecol* 2009; 34: 122
- 46 *Mazouni C, Rouzier R, Ledu R et al.* Development and internal validation of a nomogram to predict macrosomia. *Ultrasound Obstet Gynecol* 2007; 29: 544–549
- 47 *Balsyte D, Schäffer L, Burkhardt T et al.* Sonographic prediction of macrosomia cannot be improved by combination with pregnancy-specific characteristics. *Ultrasound Obstet Gynecol* 2009; 33: 453–458
- 48 *Aksoy H, Aksoy U, Karadag OI et al.* Influence of maternal body mass index on sonographic fetal weight estimation prior to scheduled delivery. *J Obstet Gynaecol Res* 2015; 41: 1556–1561
- 49 *Heer IM, Kumper C, Vogtle N et al.* Analysis of factors influencing the ultrasonic fetal weight estimation. *Fetal Diagn Ther* 2008; 23: 204–210
- 50 *Kehl S, Koerber C, Hart N et al.* New sonographic method for fetuses with small abdominal circumference improves fetal weight estimation. *Ultraschall Med* 2012; 33: 469–473
- 51 *Kehl S, Koerber C, Hart N et al.* New sonographic method for fetuses with a large abdominal circumference improves fetal weight estimation. *Ultraschall Med* 2012; 33: 265–269
- 52 *Balsyte D, Schäffer L, Zimmermann R et al.* Optimized sonographic weight estimation of fetuses over 3500 g using biometry-guided formula selection. *Ultraschall Med* 2015; [Epub ahead of print]
- 53 *Pagani G, Palai N, Zatti S et al.* Fetal weight estimation in gestational diabetic pregnancies: comparison between conventional and three-dimensional fractional thigh volume methods using gestation-adjusted projection. *Ultrasound Obstet Gynecol* 2014; 43: 72–76
